# Supplementary material
Source: publisher figshare collection journal article supplement (https://plos.figshare.com/articles/dataset/_/9892670)
Supplement: Supplementary file 1 [file 1]

Archive with 2 entries (2 files):
- pone.0222386.s001.pdf
- pone.0222386.s002.pdf
