# Supplementary material
Source: publisher figshare collection journal article supplement (https://plos.figshare.com/articles/dataset/_/9892670)

## SUPPLEMENTARY FILE 1

**Fig A. Forest plot displaying the effect sizes (and 95% confidence intervals) for positive affect.**

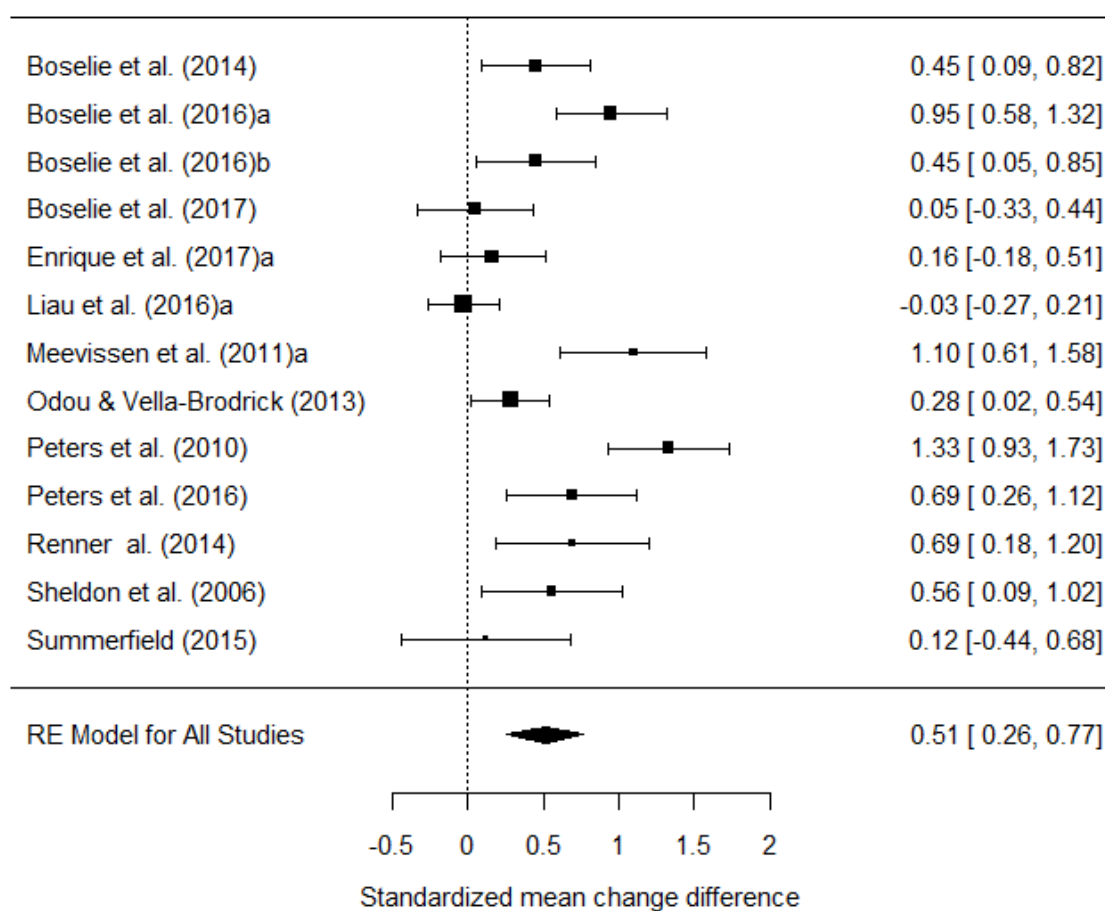

**Fig B. Forest plot displaying the effect sizes (and 95% confidence intervals) for negative affect.**

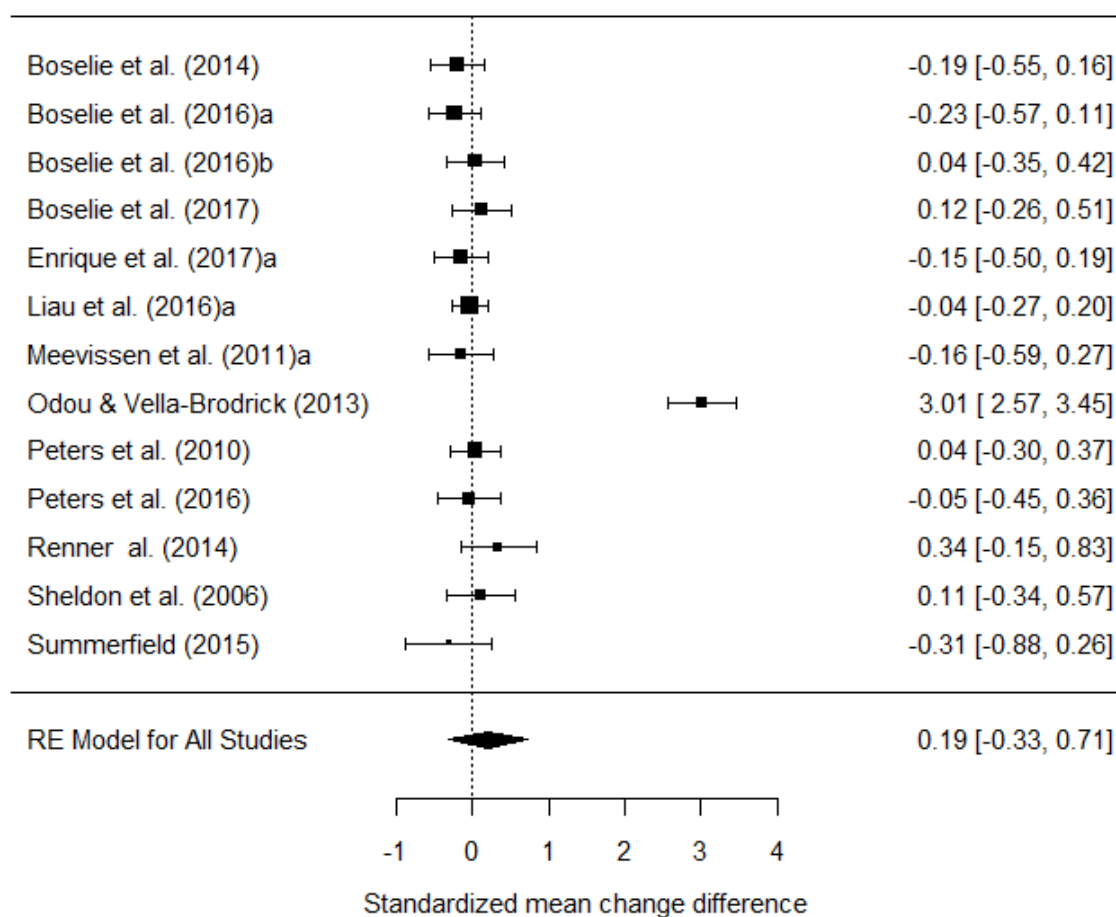

**Fig C. Forest plot displaying the effect sizes (and 95% confidence intervals) for optimism.**

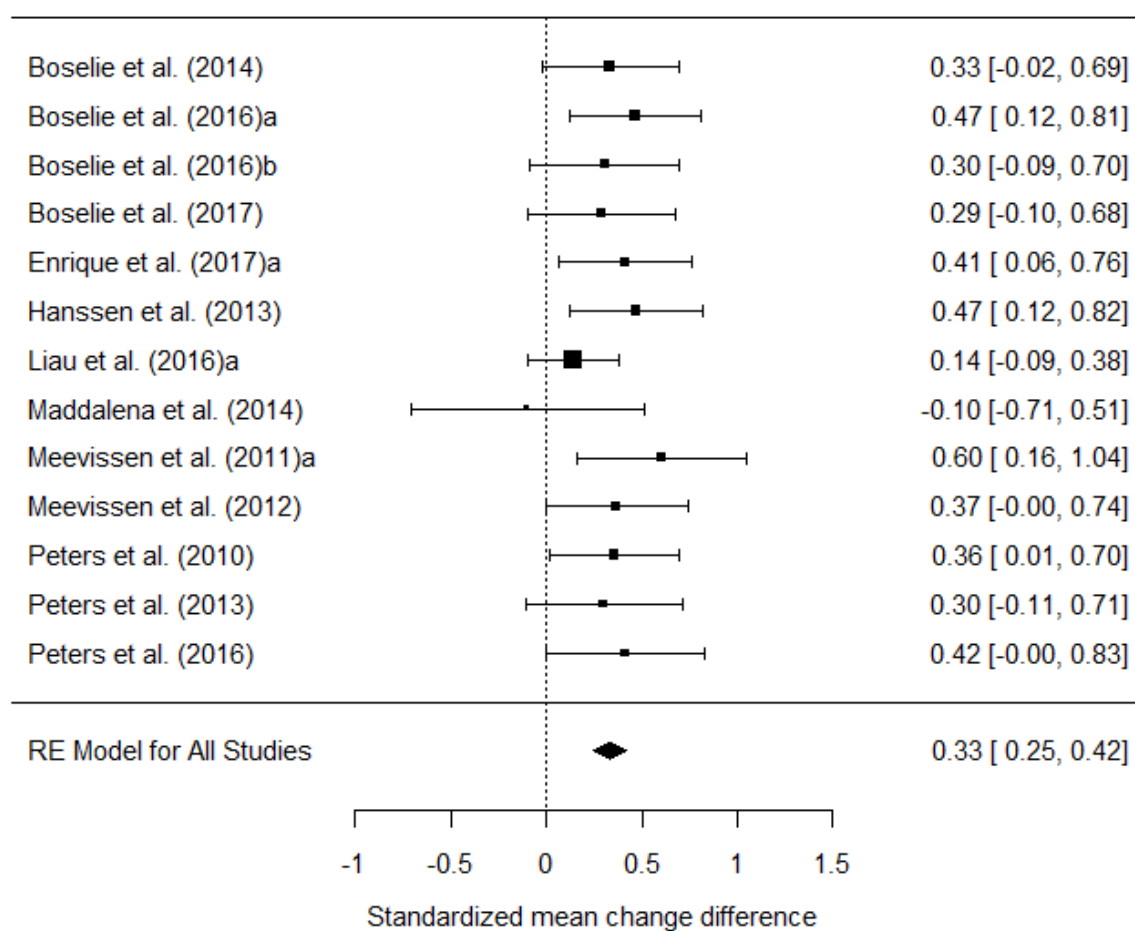

**Fig D. Funnel plot of the 13 standardized mean change difference indices for positive affect.**

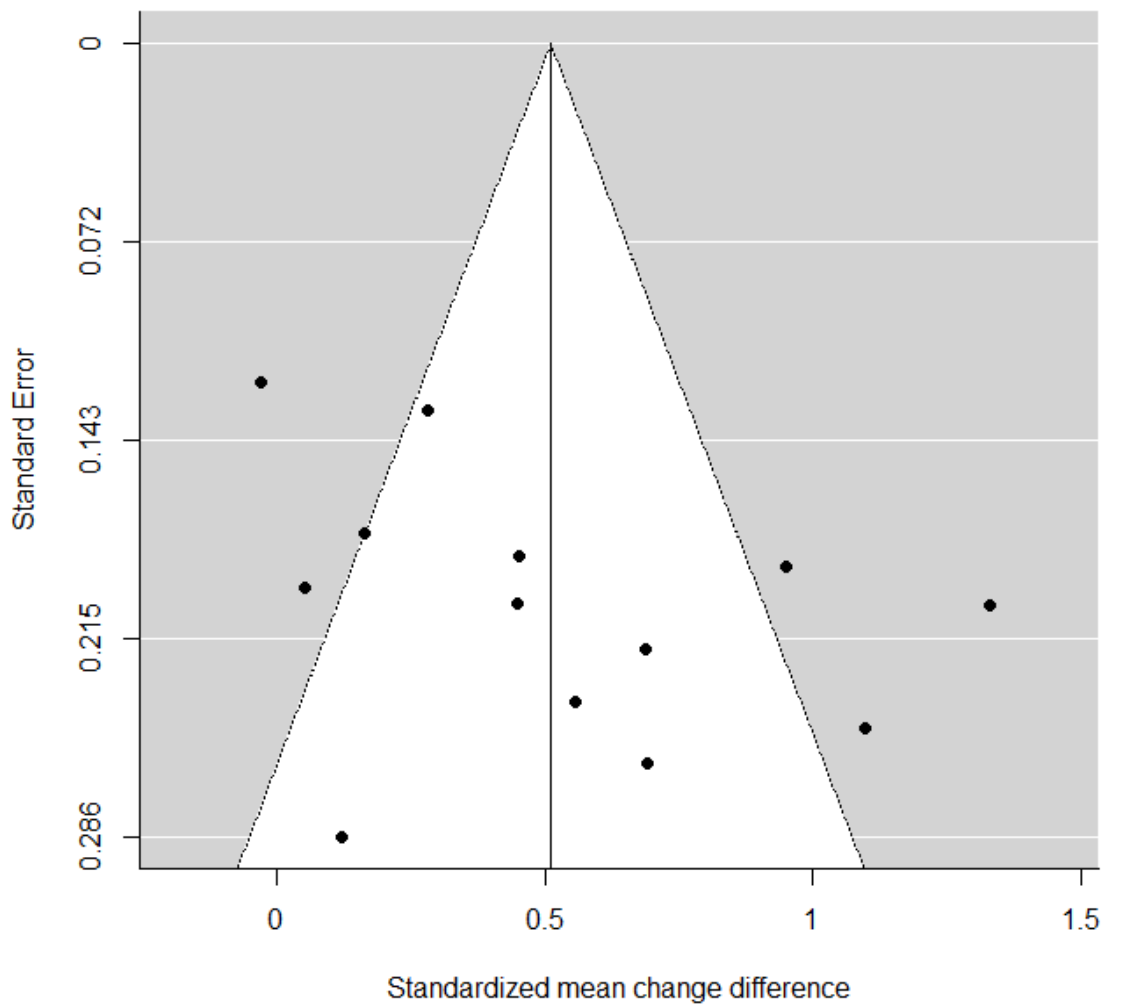

**Fig E. Funnel plot of the 13 standardized mean change difference indices for negative affect.**

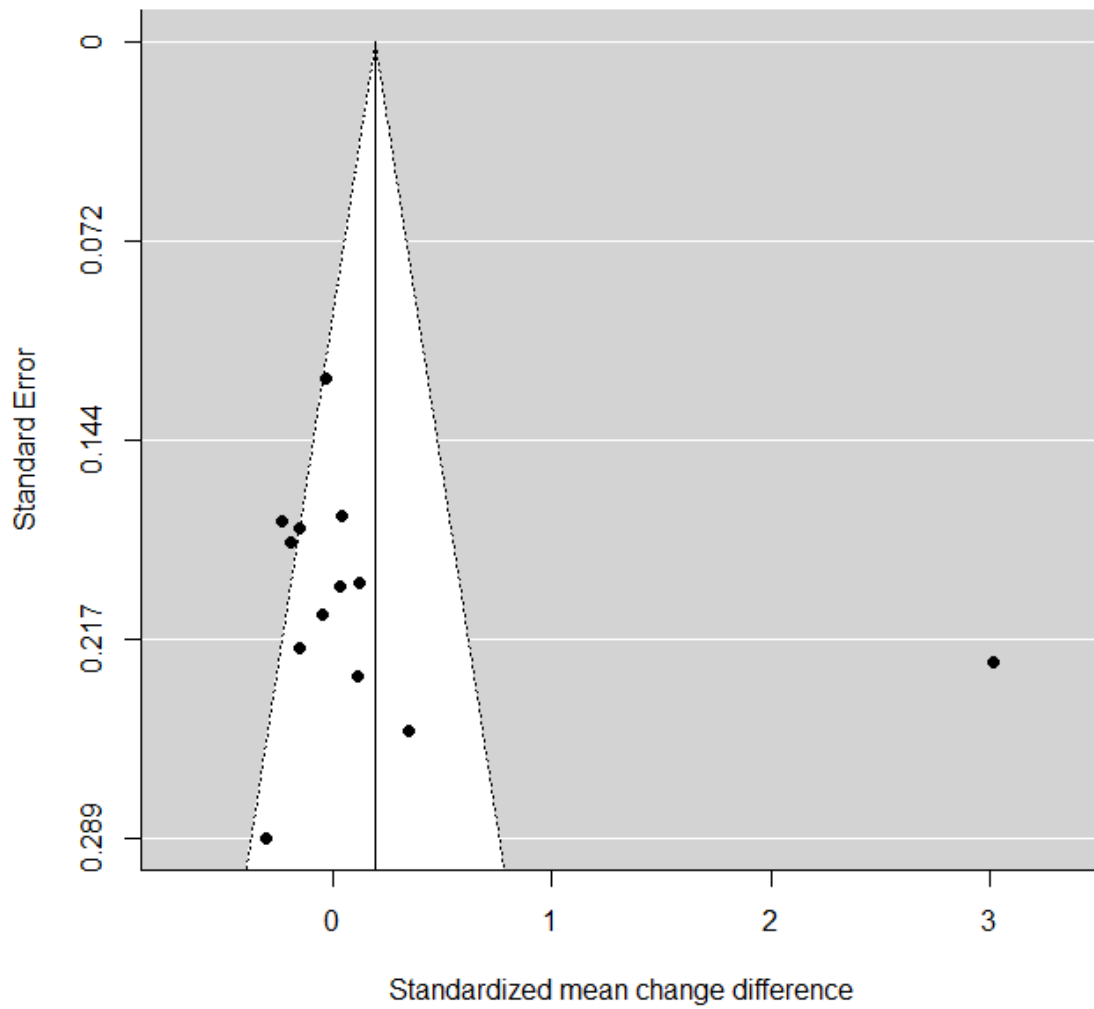

**Fig F. Funnel plot of the 13 standardized mean change difference indices for optimism. The four white circles are imputed effect sizes by means of the Duval and Tweedie’s trim-and-fill method.**

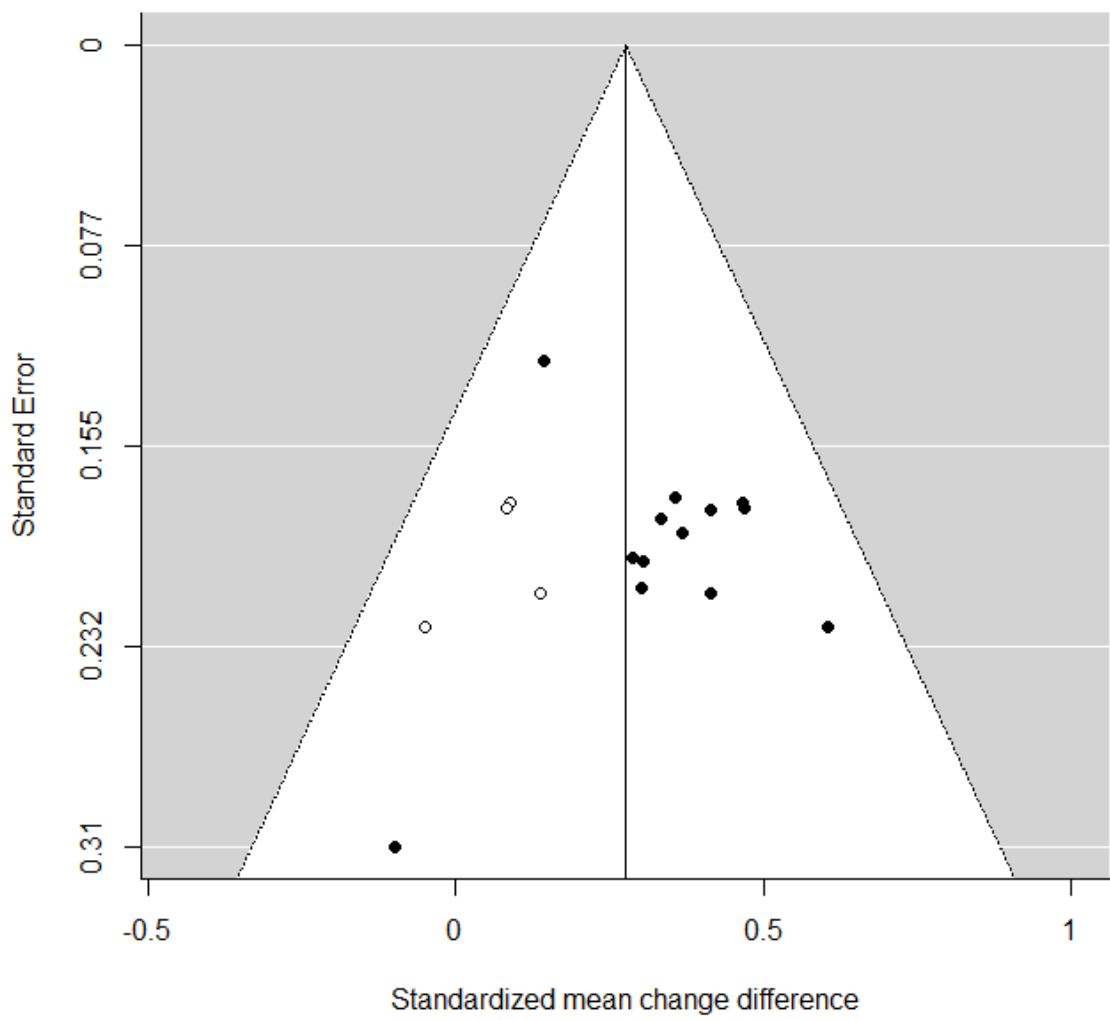

Supplement: Supplementary file 1 [file 1 › pone.0222386.s002.pdf]
